1 **Scaling between DNA and cell size governs bacterial growth**  
2 **homeostasis and resource allocation**

3

4 Boyan Li<sup>2\*</sup>, Songyuan Zhang<sup>3,8\*</sup>, Le Zhang<sup>4</sup>, Xiaoying Qiao<sup>4</sup>, Yiqiang Shi<sup>4</sup>, Cheng  
5 Li<sup>5</sup>, Qi Ouyang<sup>1,6</sup>, Ping Wei<sup>1,7#</sup>, and Long Qian<sup>1#</sup>

6

7

8 **Affiliations:**

9 1. Center for Quantitative Biology, Peking University, Beijing 100871, China.

10 2. Integrated Science Program, Yuanpei College, Peking University, Beijing 100871,  
11 China.

12 3. School of Life Sciences, Peking University, Beijing 100871, China.

13 4. Peking University Health Science Center, Beijing 100191, China.

14 5. Peking-Tsinghua Joint Center for Life Sciences, Peking University, Beijing,  
15 100871, China.

16 6. The State Key Laboratory for Artificial Microstructures and Mesoscopic Physics,  
17 School of Physics, Peking University, Beijing 100871, China.

18 7. Center for Cell and Gene Circuit Design, CAS Key Laboratory of Quantitative  
19 Engineering Biology, Shenzhen Institute of Synthetic Biology, Shenzhen Institutes  
20 of Advanced Technology, Chinese Academy of Sciences, Shenzhen 518055, China

21 8. Current address: Institute of Plant and Microbial Biology, University of Zurich,  
22 Zurich 8008, Switzerland.

23 \* These authors contributed equally.

24 # Correspondence should be addressed to [long.qian@pku.edu.cn](mailto:long.qian@pku.edu.cn) and  
25 [ping.wei@siat.ac.cn](mailto:ping.wei@siat.ac.cn).

## 1 **Abstract**

2 Bacteria maintain a stable cell size and a certain DNA content through proliferation as  
3 described by classic growth laws. How cells behave when this inherent scaling is  
4 broken, however, has rarely been interrogated. Here we engineered *Escherichia coli*  
5 cells with extremely low DNA contents using a tunable synthetic tool *CRISPRori* that  
6 temporarily inhibited chromosome replication initiation. A detailed mechanistic model  
7 coupling DNA replication, cell growth, and division revealed a fundamental DNA-  
8 centric growth law, which was validated by two observations. First, lineage dynamics  
9 were robust to large *CRISPRori* perturbations with division cycles rapidly restoring  
10 through a timer mechanism rather than the adder rule. Second, cellular growth  
11 transitioned into a linear regime at low DNA-cytoplasm ratios. Experiments and  
12 theory showed that in this regime, cellular resource was redirected to plasmid-borne  
13 gene expression. Together with the ability of *CRISPRori* to bi-directionally modulate  
14 plasmid copy numbers, these findings suggest a novel strategy for bio-production  
15 enhancement.

## 1 **Introduction**

2 Cell growth is intertwined with the cell's hereditary stability and size stability. That is,  
3 growth has to be constantly in dynamic coordination with the replication of genetic  
4 materials and cell division. Eukaryotic cells invest heavily in fail-safe mechanisms to  
5 maintain normal growth states. For example, classical DNA replication licensing and  
6 completion checkpoint mechanisms throughout the cell cycle ensure the correct  
7 chromosomal ploidy in daughter cells after division<sup>1,2</sup>. Likewise, observations have  
8 been made for important intracellular pathways that scale or not scale with cell size,  
9 with their functional implications conjectured<sup>3-5</sup>. In yeast and mammalian systems,  
10 deregulated cell size has been shown to be related to senescence and various  
11 pathological situations<sup>5-8</sup>.

12  
13 Devoid of eukaryotic cell cycle checkpoint and size control mechanisms, the  
14 prokaryotic cell serves as a *minimal model* for cell growth regulation. Shifts in growth  
15 states underlie bacterial adaptation to the astonishing environmental diversity<sup>9-13</sup>. On  
16 the other hand, understanding growth as general cellular physiology has paramount  
17 importance for microbial engineering of bio-production and other synthetic biological  
18 applications<sup>14</sup>. As cell growth is a direct consequence of the expression of structural  
19 proteins, its rate has been shown to have a linear relationship to the ribosomal  
20 content<sup>11</sup>, which in turn acts on the general translational level. Therefore, the  
21 autocatalytic production of ribosomes is believed to be the major cause of exponential  
22 cell growth<sup>15</sup>, with its rate defined by the translation elongation rate. During growth,  
23 genome replication and cell division are timely triggered by related proteins<sup>16,17</sup> to  
24 result in macroscale observables such as cell size, DNA content and the membrane  
25 surface area.

26  
27 It is noteworthy that genomic DNA plays multiple roles in these processes. On the one  
28 hand, DNA provides the ultimate template for the making of the cellular proteome  
29 that collectively drives mass accumulation and volumetric expansion. In this sense,

1 DNA, as well as transcription and translational machineries, which are themselves  
2 encoded on DNA, serve as primary catalysts for the cell as a self-replicator.  
3 Therefore, gene dosage<sup>18-20</sup> and the availability of transcription and translational  
4 proteins<sup>21-23</sup> strongly influence the rate of the self-replicating reaction. On the other  
5 hand, DNA directly participates in genome replication and cell division. Emerging  
6 work on the mechanistic origin of DNA replication initiation has served to validate an  
7 ATPase, DnaA, as an initiator protein, whose accumulation at bacterial DNA  
8 replication origin *oriC* catalyzes DNA unwinding<sup>16,24,25</sup>. As for cell division, a tubulin  
9 homolog FtsZ was identified to polymerize into a Z-ring structure that guides the  
10 bacterial cytokinetic apparatus<sup>26,27</sup>. DNA is involved here through a mechanism  
11 known as nucleoid occlusion<sup>17</sup> by providing cues for timing and positioning of Z-  
12 rings. Given the broad range of cell size in the prokaryotic kingdom<sup>28</sup>, it is  
13 conceivable that the scaling between DNA and growth-related proteins enters the  
14 exquisite regulation of cellular growth.

15  
16 Early observations of bacterial growth yielded phenomenological “growth laws”  
17 including the SMK model<sup>10</sup>, the Cooper-Helmstetter model<sup>29</sup>, Donachie’s  
18 hypothesis<sup>30</sup>, and the adder law<sup>24,28,31-33</sup>. Modern experimental investigations,  
19 especially transcriptomic and proteomic ones, have been conducted mainly under  
20 various nutritional or stress conditions<sup>11-13,34-36</sup>. Intracellular resource allocation has  
21 been postulated as the central notion for growth regulation and shown to be  
22 implemented through global translational regulation as well as transcriptional  
23 modulation via the stringent response<sup>37</sup>. Such models were able to explain growth rate  
24 changes upon environmental shifts. However, in most growth experiments, cells were  
25 not driven into extreme states with their genomic content significantly deviated from  
26 the normal range. Thereby, although genome replication was prominently present in  
27 the classic growth laws<sup>10,29,30</sup>, DNA largely remained a “hidden” variable in modern  
28 mechanistic models. Meanwhile, gene dosage has been discussed in the context of  
29 relative gene expression but is hardly connected to growth<sup>18-20,38,39</sup>. Several recent  
30 theoretical studies on balanced cell growth have proposed coarse-grained partition



1 models of RNA polymerase or ribosomes to nucleotides to explain changes in growth  
2 rates<sup>23,40</sup>, but experimental verification in prokaryotes has not been reported. It  
3 remains an interesting question as to how much one could perturb cellular physiology  
4 in terms of DNA content and its scaling with size and other proteins, and under these  
5 situations, whether growth laws hold true or require modification.

6  
7 In this work, we constructed a synthetic dCas9 based system, *CRISPRori*, to inhibit  
8 genomic replication initiation in *E. coli* cells. The system was able to reduce the  
9 DNA-cytoplasm ratio in *E. coli* cells to an extent far below the normal range. With  
10 this experimental system, we showed that homeostasis of cellular growth is  
11 maintained through lineage dynamics even when cells were driven away from their  
12 native state. A multiscale model was constructed to interrogate the molecular  
13 interactions involved in coordinated genome replication, cellular growth and cell  
14 division. The model and experimental results revealed the central role of DNA content  
15 in cellular resource allocation and the maintenance of exponential growth.

## 1 **Results**

### 2 **A CRISPR-based system decoupled chromosome replication from cell growth**

3 To directly perturb DNA replication, we constructed a synthetic replication initiation  
4 control system, *CRISPRori*, in which dCas9 was programmed to target the *oriC*  
5 region of *E. coli* (**Fig. 1A**). The system was integrated into a single medium-copy-  
6 number plasmid, with dCas9 driven by the arabinose-inducible promoter pBAD and  
7 the single guide RNA (sgRNA) driven by the constitutive promoter J23119 (**Fig. 1B**).  
8 The inhibitory effect of dCas9 was tested using the CRISPR interference experiment,  
9 where the expression of target mRFP was dampened over 30-fold compared to the  
10 negative control with non-complementary sgRNA (a 20-nt poly-adenine sequence),  
11 under the saturating concentration of arabinose. We found the attachment of an *ssrA*  
12 degradation tag to the C-terminus of dCas9 was helpful in obtaining a moderate  
13 inhibitory strength, enabling a larger dynamic range of suppression with respect to  
14 inducer concentrations (**Supplementary Fig. 1**). Therefore, the dCas9-*ssrA* fusion  
15 gene was used in the following experiments.

16  
17 The *oriC* region of the *E. coli* genome carries multiple specific binding sites for DnaA  
18 and other accessory proteins for replication initiation<sup>16,25,41</sup>. To test *CRISPRori*'s  
19 ability to suppress replication initiation, an sgRNA library collectively covering nearly  
20 90% of the *oriC* region was constructed (**Fig. 1C, Supplementary Table 1**). These  
21 sgRNAs were pre-screened *in silico* to minimize off-target effects<sup>42</sup>.

22  
23 Induction of the *CRISPRori* system led to up to 25-fold elongated cell morphologies  
24 (**Fig. 1D**). Elongation occasionally occurs in normally growing *E. coli*<sup>43</sup> or *E. coli*  
25 under certain stress conditions<sup>44</sup>. However, unlike under the latter conditions where  
26 cells exhibit multi-nucleoid “bean-like” structures without significant changes in the  
27 DNA-cytoplasm ratio<sup>45</sup>, *CRISPRori* perturbed cells retained a single nucleoid region  
28 as shown by fluorescent staining, suggesting that genome replication had been  
29 effectively decoupled from cellular growth (**Fig. 1D**). DNA-cytoplasm ratios, as

1 measured by the number of distinct nucleoid regions divided by cell lengths, were  
2  $0.1810 \mu\text{m}^{-1}$  and  $0.0798\mu\text{m}^{-1}$  for the negative control and *CRISPRori* inhibited cells,  
3 respectively (**Fig. 1E**). Secondly, the elongated cell morphologies were not associated  
4 with an irreversible transition into a reduced growth state such as senescence. Cells  
5 were able to restore their normal morphology between episodes of *CRISPRori*  
6 induction (**Supplementary Fig. 2D**).

7

### 8 **Division size and adder were sensitive to three tunable ways of initiation** 9 **perturbation**

10 To monitor cell morphology under controllable environments, we used time-lapse  
11 microscopy and a well-designed microfluidic chip<sup>46</sup> (**Supplementary Fig. 2A,B**) with  
12 chambers of  $90 \mu\text{m}$  in width and  $1.2 \mu\text{m}$  in height where *E. coli* cells freely grew in a  
13 single layer. A set of image analysis methods enabled us to acquire quantitative cell  
14 growth data for 10 hours, with high spatial ( $0.1 \mu\text{m}$ ) and temporal (3 min per frame)  
15 resolutions, on both single-cell and population levels (**Methods**).

16

17 As in the pilot test, cellular morphological changes were most conspicuous due to  
18 *CRISPRori* induction (**Fig. 1D, Supplementary Fig. 2C**). For rod-shaped bacteria, cell  
19 size can be estimated by cell width and length. Both data were extracted from time  
20 series of microscopic images of *CRISPRori* perturbed *E. coli* populations. Under all  
21 conditions, we found minimal or no significant change in cell widths compared to the  
22 control group (**Supplementary Fig. 3**). Cell width has been previously associated with  
23 chromosome elongation and increased nucleoid complexity during bacterial genome  
24 replication<sup>47</sup>. This suggested that *CRISPRori* indeed held replication at the initiation  
25 stage. Subsequently, cell length was used as a proxy for cell size.

26

27 Cell lengths right before division (i.e., division lengths) changed with varying  
28 strengths of *CRISPRori* activities, which we were able to modulate in three ways: (1)  
29 by targeting *oriC* boxes with differential affinities to the major replication initiation

1 protein DnaA, (2) by changing the inducer concentration and (3) by changing the  
2 sgRNA length.

3

4 There are eleven sites in the *oriC* region on the *E. coli* chromosome for the specific  
5 binding of DnaA, of which three (R1, R2, and R4) are high-affinity binding sites, and  
6 the rest (R5M,  $\tau$ 2, I1, I2, C1, I3, C2, and C3) are low-affinity ones<sup>16,25,41</sup> (**Fig. 1C**). Our  
7 results showed that the strong-to-weak ordering of *CRISPRori* inhibitory strengths was  
8 R1, R5M, R4, C2, and I2 (the rest were not covered by the sgRNA library), with the  
9 average division lengths ranging from less than 5  $\mu$ m to over 20  $\mu$ m (**Fig. 2B**,  
10 **Supplementary Fig. 4A**). The notable variations among target boxes suggested  
11 *CRISPRori* did not work as a roadblock to the replication fork, consistent with  
12 previously observed molecular kinetics of dCas9 on the *E. coli* genome<sup>48</sup>. Rather, it  
13 worked presumably by interfering with pre-initiation processes. To model replication  
14 initiation under *CRISPRori* inhibition, we noted two observations. First, although the  
15 dissociation time of dCas9 was estimated to be  $\sim$ 200 min<sup>48</sup>, groups like R4, C2, and I2  
16 exhibited apparently shorter interdivision cycles, suggesting that replication initiation  
17 did not halt when DnaA boxes were partially blocked. Second, the ordering of inhibitory  
18 effects was not entirely consistent with DnaA binding affinities of the target boxes, nor  
19 with results of a previous study<sup>49</sup>.

20

21 Combining with a DNA-centric cellular growth model that linked replication  
22 initiation to growth phenotypes (see next section), we tested two alternative models  
23 for replication initiation. The first “random filling” mechanism, where the probability  
24 of initiation depended on the number of boxes bound by DnaA in the *oriC* region  
25 (**Fig. 2A**) was rejected outright, since it predicted that cellular elongation scaled with  
26 the affinity of the targeted box to DnaA. Previous work showed that DnaA boxes are  
27 arranged on both sides of the R2 box in a head-to-head orientation. DnaA monomers  
28 bound to the strong binding sites R1 or R4 serve as points of nucleation to  
29 independently recruit other DnaA monomers onto low-affinity boxes to extend the left  
30 and right oligomers, both of which contribute to DNA unwinding<sup>50</sup>. Based on this, we  
31 subsequently hypothesized a two-site DnaA nucleation and oligomerization model

1 **(Fig. 2A)**, by which the probability of initiation depended on the torsion provided by  
2 completely or partially assembled DnaA oligomers<sup>41</sup>. The location of the targeted box  
3 entered into the model by affecting the size of DnaA oligomers that can form. For  
4 example, if dCas9 blocked the I2 box, the R1 oligomer should still extend to the I1  
5 box, leading to a reduced but non-zero probability of replication initiation. We found  
6 the observed inhibitory strengths well recapitulated by this model (see details in  
7 **Supplementary Note 3**).

8  
9 Next, targeting the low-affinity R5M site, we varied the inducer concentration up to  
10 0.25% arabinose and observed monotonically increasing division lengths with  
11 increasing dCas9 expression levels (**Fig. 2C, Supplementary Fig. 4C**). Using a four-  
12 state competitive binding model between dCas9 and DnaA to the *oriC* sites, we  
13 estimated the time delay of replication initiation under various *CRISPRori* strengths  
14 (**Supplementary Note 4**). The model predicted a transition of population behavior  
15 from a diffusion-limited bimodal phase to a dissociation-limited homogenous phase in  
16 single-cell division times and elongation morphologies, which were recapitulated in  
17 experiments (**Supplementary Fig. 5**). We also modulated the inhibition strength by  
18 changing the complementary length between the guide RNA and its target site, which  
19 was reported to introduce less noise than dCas9 expression modulation did<sup>51</sup>. For the  
20 R1 DnaA box, progressive truncations of sgRNAs by 1-nt resulted in significant  
21 decreases in division length (**Fig. 2D, Supplementary Fig. 4B**).

22  
23 How cells maintain their sizes in a narrow range has been investigated extensively in  
24 previous research<sup>24,28,31-33,52-54</sup>. Some bacteria, such as *E. coli* and *B. subtilis*, were  
25 hypothesized to control their sizes following the “adder” principle by adding a  
26 constant volume between birth and division. The adder was artificially broken by the  
27 synthetic expression of DnaA and FtsZ proteins in a previous study<sup>24</sup>. Noticing that an  
28 ongoing replication cycle could prevent cell division through nucleoid occlusion, we  
29 evaluated how the division adder responded to initiation perturbation. As expected,  
30 our data indicated that the division adder showed large variation until it broke down in

1 the face of excessive replication postponement at strong inhibition levels (**Fig. 2E,F,**  
2 **Supplementary Fig. 6**). Additionally, a previous study indicated the adder principle  
3 held true for multi-nucleoid filamentous *E. coli* cells that naturally occurred under  
4 stress conditions<sup>29</sup>. In our study of single-nucleoid filamentous cells with very low  
5 DNA-cytoplasm ratios, however, divisions transiently followed the “timer” principle  
6 before cell states were restored (**Fig. 2F, Fig. 3E**).

7  
8 Taken together, these results showed that the *CRISPRori* synthetic system was highly  
9 tunable and quantitatively predictable in perturbing genomic replication initiation.

## 11 **A DNA-centric growth model for *Escherichia coli***

12 Over the past decade, bacterial growth has been modeled extensively as a consequence  
13 of the nutrition flux and dynamic cellular resource allocations<sup>11,12,34-37,55</sup>. Because the  
14 DNA content in bacterial cells has not been experimentally perturbed to large extents,  
15 these models largely neglect the contribution of genome dynamics in cell cycle  
16 progression.

17  
18 Gene dosage effect has long been observed in prokaryotes, and recent studies have  
19 begun to fathom its underlying molecular mechanisms in relation to the partition of  
20 RNA polymerases (RNAP)<sup>22,23,56</sup>. In order to answer whether the cellular DNA content  
21 has an impact on general physiology, we proposed a mathematical model of cellular  
22 growth, taking DNA content as a central variable governing cell cycle progressing and  
23 general gene expression (**Fig. 3A**). The model was built on three major hypotheses:

- 24 (1) RNAP and ribosomes were evenly distributed to all promoters and the ribosome  
25 binding sites on messenger RNAs, respectively.
- 26 (2) For unregulated, constitutively expressed genes, firing frequencies of transcription  
27 and translation were dependent on the local concentration of RNAP and ribosomes,  
28 respectively, in a Hill-type manner.
- 29 (3) DnaA governed the timing of DNA replication initiation, and cell division was

1 contingent on FtsZ concentration and the presence of at least two nucleoids.

2

3 A detailed description of the model and the computation methods can be found in  
4 **Supplementary Notes 1 and 2**. Other notable processes previously reported to have  
5 affected DnaA-dependent replication initiation, including *oriC* sequestration, DnaA  
6 titration, auto-repression of DnaA transcription, the equilibrium between ATP-bound  
7 and ADP-bound form of DnaA, regulatory inactivation of DnaA (RIDA), etc.<sup>16,25</sup>, were  
8 all taken into consideration in the model. The criterion for DNA replication initiation  
9 as well as the model for dCas9-DnaA competitive binding were the same as described  
10 in previous sections. To avoid artifacts, most of the parameters were directly taken or  
11 estimated from previous measurements, with only the exponential growth rate and the  
12 free energy DnaA oligomers provides to unwind DNA fitted to the experimental results  
13 of the current study (**Supplementary Note 6**). Due to the stiffness of the system, a  
14 mixed method of Langevin equations and Monte Carlo sampling was used for  
15 numerical simulations, which enabled us to obtain high-resolution dynamic pictures of  
16 intracellular processes, where states of every replication origin (replicated and released,  
17 dCas9-bound or sequestered) were independently tracked (**Supplementary Note 5**).

18

19 As a control, we verified that at normal DNA-cytoplasm ratios, the model well  
20 recapitulated the quantitative phenomenological relations discovered and validated in  
21 past decades, including the Schaechter-Maaløe-Kjeldgaard's exponential growth law<sup>10</sup>,  
22 Donachie's hypothesis of initiation mass<sup>30</sup>, the adder principle<sup>31-33</sup>, and the linear  
23 relation between growth rate and ribosomal content as well as the unrelated protein  
24 expression<sup>11</sup> (**Supplementary Fig. 7**). Besides, we asked whether the mechanisms we  
25 involved in the model are necessary for the cell to maintain normal physiology. We  
26 computationally "knocked out" RIDA, *datA* or DnaA auto-repression, and found that  
27 cells without any of these mechanisms exhibits either abnormal DNA replication or  
28 violation of "adder" principle (**Supplementary Fig. 14**). The simulation results show  
29 that our model is non-redundant and able to describe *E. coli* cell behavior in normal  
30 conditions, implying its potential in being extended to other regimes. In the following

1 sections, combining experiment results with modeling, we focus on the cell cycle and  
2 cell growth at a DNA-cytoplasm ratio far below the normal range.

3

#### 4 **Inter-division cycles exhibited homeostasis upon initiation perturbation**

5 The breakdown of the division adder indicated severe cell cycle delays. Combining  
6 experimental observations and theoretical modeling, we first investigated how the  
7 temporary pause on genome replication caused by *CRISPRori* affected the cell's  
8 division time. We collected interdivision times, i.e., the time interval between two  
9 consecutive cell division events, along single lineages of *CRISPRori* perturbed cells.  
10 Counterintuitively, even though cells were more likely to grow to larger sizes, the  
11 average interdivision time along their lineages remained unchanged (**Fig. 3B,C**,  
12 **Supplementary Fig. 8**).

13

14 A close examination of interdivision times revealed that delayed division did occur for  
15 elongated cells. The fraction of long cell cycles increased with perturbation strength,  
16 with the longest reaching ~300 min. Commensurately, extremely short division cycles  
17 also occurred more frequently, with the shortest being less than 3 min. This was  
18 reflected by the divergence of the interdivision time to a wide distribution under  
19 strongly perturbed conditions (**Fig. 3B,C**). Interestingly, long cell cycles were almost  
20 always followed by several unusually short cell cycles until division time finally relaxed  
21 to the lineage mean, as revealed by the negative correlations in the interdivision time  
22 series that extended over eight generations after a prolonged cell cycle (**Fig. 3D**). The  
23 strong coupling between long and short cell cycles suggested a prompt compensation  
24 mechanism to maintain cell cycle homeostasis despite constant perturbations to a key  
25 process in cellular growth.

26

27 Numerical simulations well reproduced experimental observations of cell cycle  
28 homeostasis. Simulated dynamics of DNA content, free DnaA-ATP, and FtsZ along  
29 continuously dividing cell lineages were tracked (**Fig. 3E**, **Supplementary Fig. 9**,



1 **Supplementary Video 1,2).** During the stoppage of DNA replication initiation, the cell  
2 continued expressing proteins, leading to the excessive accumulation of the initiator  
3 protein DnaA and the division protein FtsZ. After dCas9 dissociated, the excess DnaA  
4 and FtsZ promoted rapid rounds of replication initiation and cell division, resulting in  
5 unusually short cell cycles. These simulation results suggested the vertical passage of  
6 important cell cycle control proteins served a non-genetic “memory” that restored the  
7 cells to their normal growth states. Analytical estimation suggested the interdivision  
8 time converged to the long-term mean on an exponential time scale. In this “relaxation”  
9 period, however, the rate of convergence was initially faster than that obtained from the  
10 adder principle for normally growing cells (**Supplementary Note 7, Supplementary**  
11 **Fig. 10**). We concluded that scaling between the DNA content and key cell cycle  
12 proteins enabled cells to self-repair abnormal DNA-cytoplasm ratios. As will be  
13 discussed below, the DNA-cytoplasm ratio can promote pronounced growth rate  
14 changes.

15

16 In addition, we separately verified that division ring organization and division site  
17 selection were largely unaffected by *CRISPRori* perturbation. They obeyed the law  
18 described in a previous study on filamentous *E. coli* of normal DNA-cytoplasm ratio<sup>44</sup>,  
19 despite an increased noise that occasionally led to extremely small, nucleoid-free  
20 daughter cells (**Supplementary Fig. 11**).

21

## 22 **Cell growth degenerated to linearity at low DNA-cytoplasm ratios**

23 A recently published theory and an experimental study in yeast revealed a linear mode  
24 of cell growth upon DNA limitation<sup>6,40</sup>. Since *CRISPRori* produced cells with  
25 extremely low DNA-cytoplasm ratios, we experimentally measured their growth rates  
26 when *CRISPRori* was induced at different strengths. We found significant perturbation-  
27 dependent growth retardation in *CRISPRori* treated cells. Both single-cell instantaneous  
28 growth rates (based on cell length, **Fig. 4A, Supplementary Fig. 12B-F**) and bulk  
29 growth trajectories (as measured by the fraction area covered by cells in a microfluidic

1 chamber, **Supplementary Fig. 12A**) exhibited a gradual transition from exponential to  
2 linear growth following the induction of *CRISPRori*. However, filamentous cells with  
3 normal DNA-cytoplasm ratios maintained exponential growth for more than 2 hours  
4 and up to  $\sim 100 \mu\text{m}$  in length until cell death<sup>57</sup>.

5  
6 In the phase plane of cell size ( $L$ ) and cell growth rate ( $dL/dt$ ), the observed cell state at  
7 any instantaneous time fell within a “permitted growth” regime enclosed by a straight  
8 line for exponential growth and a curved line that leveled off at a constant linear growth  
9 rate (**Fig. 4B**). The boundaries were fully mapped out by numerical simulations and  
10 were dependent on a constant nutrient supply. As indicated by the model, cells with  
11 high DNA-cytoplasm ratios (i.e., multi-nucleoid cells) always collapsed on the  
12 exponential boundary because the production of RNAP and ribosomal components  
13 were well balanced by the replicating genome. The permitted growth regime was  
14 expanded by decreasing nucleoid-cytoplasmic ratios, with which the accumulating  
15 RNAP and ribosomes gradually saturated the available gene copies and mRNAs,  
16 respectively. On the linear boundary, cellular production was strongly suppressed by a  
17 dearth of gene templates on the single genome copy. In agreement with theory, we found  
18 lineages unaffected by *CRISPRori* fluctuated around the exponential boundary in a  
19 narrow size range (normal size plus the adder), whereas *CRISPRori* treated lineages  
20 deviated toward the linear growth boundary, made large excursions into the permitted  
21 growth regime, and retreated to the exponential growth boundary in a few rounds of  
22 cell divisions (**Fig. 4B**). These results underscored the essentiality of the balance  
23 between genome number and the cytoplasmic content in maintaining exponential  
24 growth, and the cells made their way back to normal through short division cycles.

25

## 26 **Limiting genomic DNA enhanced the expression of plasmid-encoded genes**

27 The previous analysis suggested that gene copy numbers played a key role in  
28 intracellular resource allocation. In the presence of *CRISPRori*, as genes are mostly  
29 saturated by RNAP and mRNAs saturated by ribosomes, an intracellular resource

1 surplus could be generated. We speculated that these spared resources might be  
2 redirected to plasmid-encoded genes for a high yield of recombinant proteins (**Fig. 4C**).

3

4 We tested the expression of a plasmid-borne *gfp* gene in *CRISPRori* inhibited cells. The  
5 gross production, unit production (per OD600 unit), and single-cell fluorescence were  
6 measured under a series of arabinose concentrations. We found that replication  
7 perturbation indeed increased the unit GFP production with inducer concentration up to  
8 0.25% (**Fig. 4D**), while the gross production peaked early at mild perturbation strengths  
9 of 0.05-0.1% arabinose (measured by plate reader, **Supplementary Fig. 13A**). The non-  
10 monotonicity between gross production and perturbation strength was attributed to the  
11 competition between the increased GFP production rate and the dampened cellular  
12 growth rate. The single-cell fluorescence as measured by flow cytometry increased  
13 monotonously with arabinose concentration (**Supplementary Fig. 13B**).

14

15 Assuming plasmid replication depended on cytoplasmic DnaA concentration but was  
16 not inhibited by *CRISPRori*, model-simulated proteomic fraction of GFP behaved  
17 qualitatively the same with experimentally measured fluorescence (**Fig. 4C**,  
18 **Supplementary Fig. 13C**). The agreement suggested that bio-production can be  
19 optimized through the redistribution of intracellular resources on DNA.

20

## 21 ***CRISPRori* enabled bidirectional tuning of the plasmid copy number**

22 In theory, *CRISPRori* can be applied to any genetic system with a sequence-specific  
23 replication initiation mechanism. In particular, plasmids use diverse mechanisms to  
24 precisely regulate their copy number, which also mainly occur at the origin of  
25 replication<sup>58</sup>. Unlike bacterial chromosomes, many plasmids typically use antisense  
26 RNAs (or both RNAs and proteins) as a regulatory strategy<sup>59</sup>. For example, in the p15A  
27 origin, two promoters with opposite orientations direct the synthesis of a long RNA  
28 (RNA II) as the replication primer and of a short RNA (RNA I) that forms a duplex with  
29 the primer to block replication initiation<sup>60</sup>.

1

2 We tested the ability of *CRISPRori* to modulate plasmid replication both ways. The  
3 *CRISPRori* system was placed on a low copy number plasmid of the pSC101 origin. A  
4 plasmid containing a p15A origin and a constitutively expressed *mrfp* gene was used as  
5 the target. Two sgRNAs were designed to target RNA I and the initiation site,  
6 respectively (**Fig. 5A**). The RFP fluorescence was measured to quantify the plasmid  
7 copy number<sup>61</sup>. In a concentration-dependent manner, fluorescence decreased when the  
8 initiation site was targeted but increased when the replication inhibitor RNA I was  
9 targeted. Collectively, bidirectional replication modulation by *CRISPRori* led to from  
10 1/10 to 3-fold plasmid copy number variation at 0.25% arabinose concentration (**Fig.**  
11 **5B**). Guided by theory, flexible control of chromosome and plasmid DNA contents by  
12 *CRISPRori* might provide a novel way of adjusting intracellular resource allocation for  
13 the optimization of bio-production.

14

## 1 Discussion

2 In this study, we applied dCas9-based DNA replication control to investigate how  
3 DNA replication initiation is coupled to cell division and cell growth. Other ways of  
4 halting replication include initiation sequence deletions and knockdown of  
5 components of the replication machinery. However, they suffered from lethality,  
6 pleiotropic effects, or functional redundancy<sup>62-64</sup>. A few previous studies used similar  
7 dCas9 systems to regulate replication initiation both *in vivo* and *in vitro*<sup>49,65,66</sup>. Our  
8 design of *CRISPRori* was more compact and optimized. And we showed *CRISPRori*  
9 provides tunable and reversible ways to regulate replication initiation.

10

11 The system allowed modeling that quantitatively elucidated the molecular processes  
12 underlying DnaA-mediated replication initiation and the competitive binding between  
13 dCas9 and DnaA. For example, the diverse effects when targeting different *oriC*  
14 boxes were explained by a double oligomer model, which showed consistency with a  
15 previous observation that nearly the entire right half of *oriC* was dispensable for  
16 proper functioning<sup>50</sup>. With almost all parameter values reported in literature, these  
17 mechanistic models coupling to a transcription-translation-based growth model  
18 faithfully recapitulated phenotypes induced by *CRISPRori*, including those related to  
19 cell cycle homeostasis and growth transitions. They together function as a multiscale  
20 model with sufficient molecular details that could serve as a foundation for other  
21 cellular physiological models. The model was solved through Langevin dynamics,  
22 which left out sources of molecular noise in, e.g., transcription and translation  
23 processes. How these noise properties finetune the population growth behavior  
24 remains a meaningful question to pursue.

25

26 By producing extreme DNA-cytoplasm ratios in live cells, *CRISPRori* enabled deep  
27 exploration into bacterial physiological regulation. One important discovery is the  
28 homeostasis of the division cycle under replication initiation perturbation. A previous  
29 study found that the division adder was independent of initiation control<sup>24</sup>. However,  
30 perturbation applied in the study was through oscillating DnaA, which was mild  
31 enough to not have changed the division size as reported previously<sup>63</sup>. In comparison,  
32 the *CRISPRori* experiments significantly affected division size and broke the division  
33 adder, fundamentally violating the  $\tau_{cyc} = C + D, D > 0$  condition<sup>24</sup>. We showed that

1 even in such conditions, the homeostasis of division cycles was maintained along  
2 single lineages. Further, we found the timer mechanism applied during the relaxation  
3 from a replication-inhibited state to the steady growth states, driven by the completion  
4 of new rounds of DNA replications. This represented a far-from-steady-state response.  
5 The exponential convergence rate for the timer mechanism was higher than that of the  
6 adder mechanism, which usually applies to noise-driven cell cycle heterogeneities  
7 near the steady state.

8  
9 Another important discovery is the DNA-centric growth law, i.e., scaling between  
10 DNA and cytoplasmic proteins tuned cellular growth between two growth modalities.  
11 Previously, growth rate was recognized as a nutrition-dependent parameter and found  
12 to be internally constrained by the allocation of intracellular resources to ribosome  
13 synthesis<sup>11</sup>. Here, we demonstrated that, as DNA concentration decreased, widely  
14 accepted exponential growth degenerated into linear growth. Instead of ribosomes,  
15 DNA became the limiting factor governing cell growth<sup>38,39</sup>. This has been predicted  
16 by a theory before, but it is the first time that it was observed in live bacteria<sup>40</sup>.

17  
18 Taken together, these observations suggested higher plasticity in DNA-cytoplasm  
19 ratios as well as growth modes for bacterial than for eukaryotic cells. One reason  
20 might be the relative independence between DNA replication and cell division, with  
21 which bacterial cells can rescue themselves by triggering consecutive divisions even  
22 at the cost of generating non-proliferable daughter cells. Unfortunately, eukaryotic  
23 cell cycle progression is controlled so tightly that division cannot occur without  
24 chromosome replication.

25  
26 These fundamental findings inspired a potential application of the DNA-centric  
27 growth law and the *CRISPRori* system in bacterial physiological engineering. We  
28 showed *CRISPRori* regulation enabled production enhancement of recombinant  
29 proteins by directing spared RNAP and ribosomes to plasmid-encoded genes. It is also  
30 conceivable that energetic expenditure on DNA replication and cell division can be  
31 saved and used on product synthesis during replication initiation suppression. Further,  
32 we demonstrated bidirectional regulation of plasmid copy number by *CRISPRori*,  
33 implying its versatility for different biological systems, as we have accumulated  
34 massive sequencing data and annotations about the replication origin<sup>67</sup> and proved

1 Cas9's compatibility with diverse host organisms<sup>68</sup>. The system may be used for  
2 balanced resource partitioning between host vs. synthetic genes, which provides a  
3 potentially better solution than unilaterally tuning up the plasmid copy number and  
4 letting synthetic functions exploit cellular resources. Lastly, the system's reversibility  
5 can be leveraged to ensure the long-term robustness of engineered microbial cells.  
6

## 1 **Material and Methods**

### 2 **Strains and culture**

3 *E. coli DH5 $\alpha$*  strain was used for molecular cloning and measurements throughout this  
4 study. Incubations were carried out using a Digital Thermostatic Shaker (AOSHENG)  
5 at 37 °C and 1,000 rpm., using flat-bottom 96-well plates sealed with sealing film  
6 (Corning, BF-400-S). LB medium was used for molecular cloning and overnight  
7 incubation after picking single colonies from the plate. Before all measurements (DNA-  
8 cytoplasm ratio, growth monitoring in microfluidic chip, fluorescence), cells were  
9 cultured in M9 medium, according to a set of previously reported experimental  
10 procedures<sup>69</sup> to ensure that gene expression was at the steady state. Antibiotic  
11 concentration used in this study was: Ampicillin (50 mg/mL), Chloramphenicol (17  
12 mg/mL).

### 13 **Plasmid construction**

14 The information on genetic parts used in this study can be found online  
15 (<https://2019.igem.org/Team:Peking/Parts>). The target sequence was inserted into  
16 sgRNA expression cassette using Golden Gate assembly (for more details, please refer  
17 to [http://parts.igem.org/Part:BBa\\_K3081058](http://parts.igem.org/Part:BBa_K3081058)). *CRISPRori* plasmids were constructed  
18 using pRG vector<sup>70</sup>, except in the plasmid copy number control experiment, where  
19 pSB4A5 vector was used. GFP-producing plasmid in expression enhancement  
20 experiment was constructed using pSB1C3 vector. The RFP-producing plasmid that  
21 indicated plasmid copy number was constructed using pSB3C5 plasmid.

### 22 **Monitoring cell growth in the microfluidic device**

23 For detailed information about microfluidic chip design, fabrication, and operation,  
24 please refer to the original literature<sup>46</sup>. Before transferred into microfluidic chips, cells  
25 were inoculated from LB plate and cultured in LB medium overnight, then diluted into  
26 M9 medium and cultured for 3 hours. In the chip, cell growth was continuously  
27 monitored for 10 hours by taking pictures with a time interval of 3 min. For each group



1 or treatment, 8 microchambers were selected as parallels.

## 2 **Nucleoid staining and observation**

3 DAPI was used to stain the nucleoids in *E. coli* with a working concentration of 10  
4  $\mu\text{g}/\text{mL}$ . About 15 minutes after mixing bacteria with DAPI, the medium was replaced  
5 by PBS through precipitation-resuspension. After washing three times, the bacteria  
6 were available for microscopic imaging. Nucleoids were observed under laser scanning  
7 confocal microscope (UltraVIEW VoX, PerkinElmer, Inc.). Z-axis scanning for 2  $\mu\text{m}$   
8 with 0.2  $\mu\text{m}$  each step overcame the imaging difficulty caused by rising and fall along  
9 the long cell body.

## 10 **Cell cytometry and plate reader**

11 Single-cell fluorescence was measured using the flow cytometer (BD LSRFortessa)  
12 with appropriate voltage settings. For each assay, at least 20,000 events were collected.  
13 Flow cytometry data were analyzed using FlowJo software to obtain the arithmetic  
14 average of fluorescence intensity. For batch culture, the microplate reader (Thermo  
15 Scientific Varioskan Flash) was used to measure the fluorescence intensity and OD  
16 value. For both approaches, each group had at least 3 parallels.

## 17 **Image analysis**

18 Volocity Demo 6.1.1. was used for confocal microscopy image analysis. To identify all  
19 nucleoids in one cell, XY planes were merged first; then contrast enhancement was  
20 performed. ImageJ software was used for cell dimension analysis (length and width),  
21 which was acquired by manually tracing cell lineages and doing measurements (using  
22 “segmented line” or “straight line”) at each time point. Time-lapsed cell length data can  
23 be further analyzed to calculate interdivision time and instantaneous growth rate. The  
24 coverage area was automatically calculated by creating an ImageJ Macro script.

## 25 **Data analysis and numerical simulations**

26 All data analysis pipelines and numerical simulations are performed with MATLAB  
27 R2020a and Jupyter lab (Python 3.8). For modeling and simulation details, see

1 **Supplementary Notes 1-6.**

2

3 **Acknowledgments**

4 We sincerely thank members of 2019 Peking University iGEM (International  
5 Genetically Engineered Machine Competition) team for doing preliminary works. We  
6 thank the Computing Platform of the Center for Life Science. We thank Fengyu Zhang  
7 and Prof. Chunxiong Luo for providing us with microfluidic chips and technical  
8 supports; Zhiwen Zhang for providing us with technical supports on microscopy; Prof.  
9 Qingsong Wang, Prof. Xinqiang He for lab equipment supports; Prof. Yihan Lin, Yihao  
10 Zhang and other colleagues for invaluable discussions. This work was supported by the  
11 National Key R&D Program of China (No.2020YFA0906900), the Natural Science  
12 Foundation of China (No. 31901063, No. 12090054) and the Top Notch Project 2.0 of  
13 PKU School of Life Sciences.

14

15 **Author contributions**

16 S.Z., B.L., L.Q., P.W., Q.O., C.L. conceived the project. S.Z., B.L., L.Z., X.Q., and Y.S.  
17 designed and performed experiments. B.L., S.Z., L.Z. analyzed experimental data. B.L.  
18 and L.Q. constructed mathematical models and did numerical simulations. B.L., S.Z.,  
19 and L.Q. created figures and wrote the manuscript.

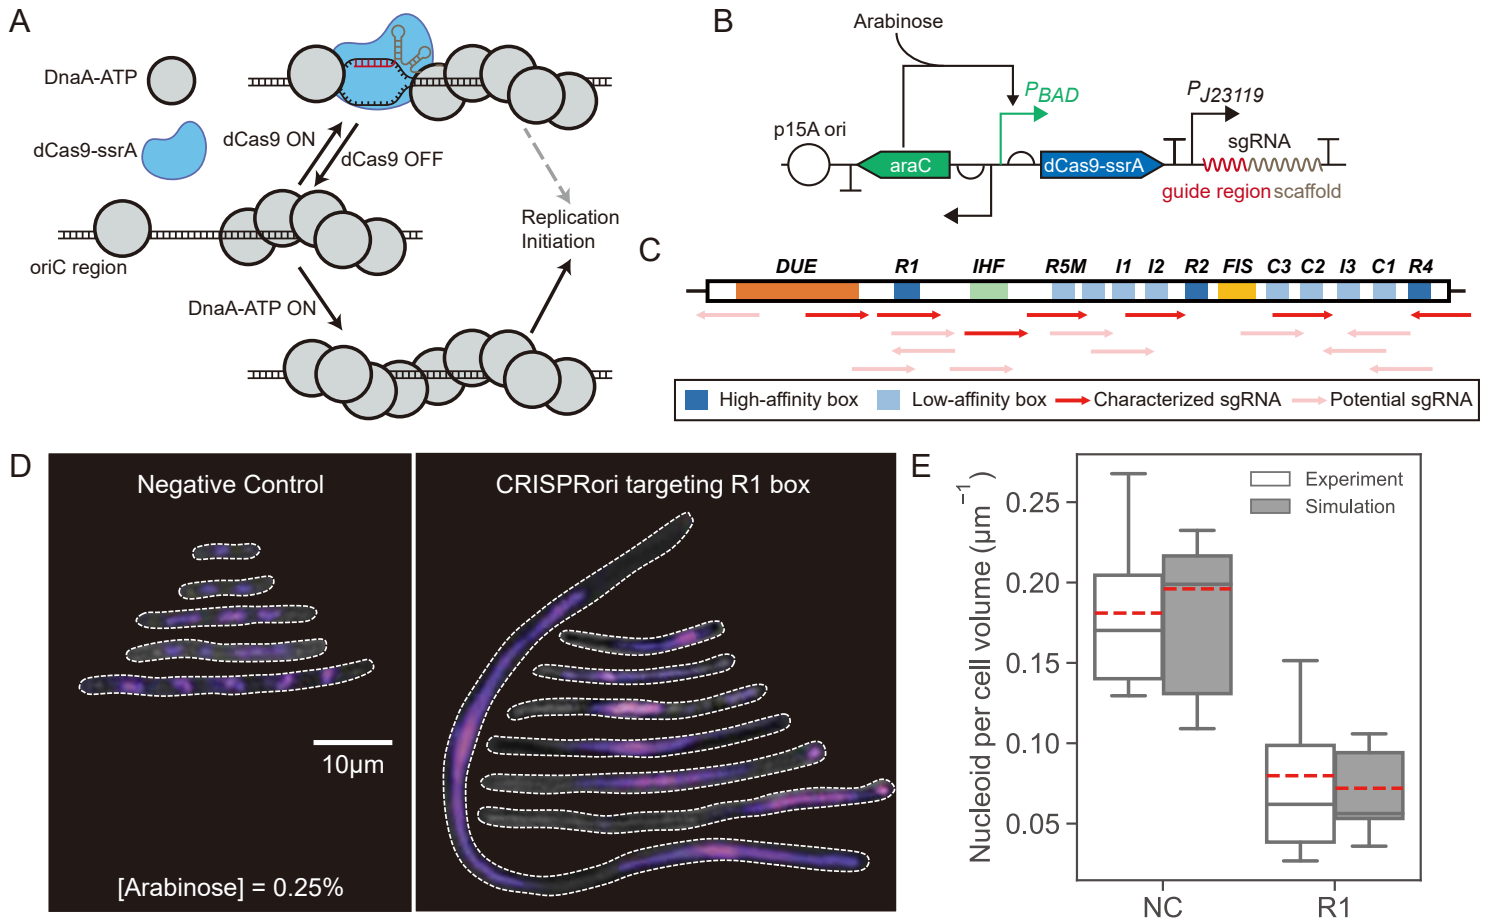

1 **Figure 1. Design of *CRISPRori* to perturb prokaryotic genome replication**  
2 **initiation.**

3 **A.** A schematic diagram of the synthetic replication initiation perturbation system,  
4 *CRISPRori*. dCas9 is programmed to target various binding sites of DnaA-ATP in the  
5 *oriC* region.

6 **B.** Plasmid construction of *CRISPRori*. dCas9-ssrA and sgRNA is integrated on a single  
7 plasmid. Expression of dCas9-ssrA is induced by arabinose, while the sgRNA is  
8 transcribed constitutively.

9 **C.** An sgRNA library (red and pink arrows) targeting different sites on *oriC*. While  
10 many targetable sequences exist in the *oriC* region, seven were experimentally  
11 characterized (red arrows). Characterized sgRNAs cover all categories of DNA  
12 elements, including (i) DnaA-boxes with high (dark blue) and low (light blue) affinities  
13 to DnaA-ATP, respectively; (ii) DNA unwinding element (DUE, orange box) where  
14 replisomes bind; and (iii) binding site of the regulatory protein IHF (green box).

15 **D.** *CRISPRori* decoupled DNA replication from cell growth. Confocal images of cells  
16 expressing *CRISPRori* with sgRNA targeting the R1 box or a negative control sgRNA  
17 (20-nt poly(A)). Nucleoids were stained by DAPI (purple). The inducer concentration  
18 was 0.25%.

19 **E.** Experimental and simulation results of number of nucleoids per unit cell length. In  
20 the NC group, cells occasionally grew very long but maintained a certain nucleoid-to-  
21 cytoplasmic ratio ( $\sim 0.1592 \mu\text{m}^{-1}$ ). In the *CRISPRori* group, cells grew longer without  
22 replicating their chromosomes, resulting in much lower nucleoid-to-cytoplasmic ratios  
23 ( $0.03196 \mu\text{m}^{-1}$ ).  $N_{\text{cell}} = 30\sim 50$ . In this and all box plots below, the gray lines in the  
24 middle of boxes show the median, the red dashed lines show the mean, the boxes show  
25 the upper and lower quartiles and the whiskers extend through 10%-90% of the data.

26

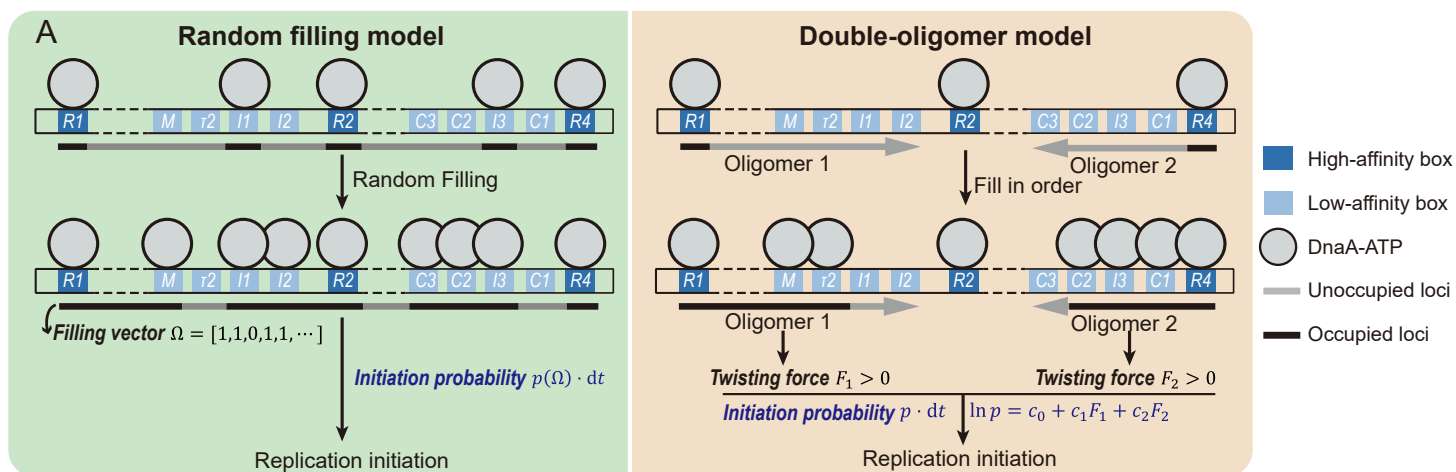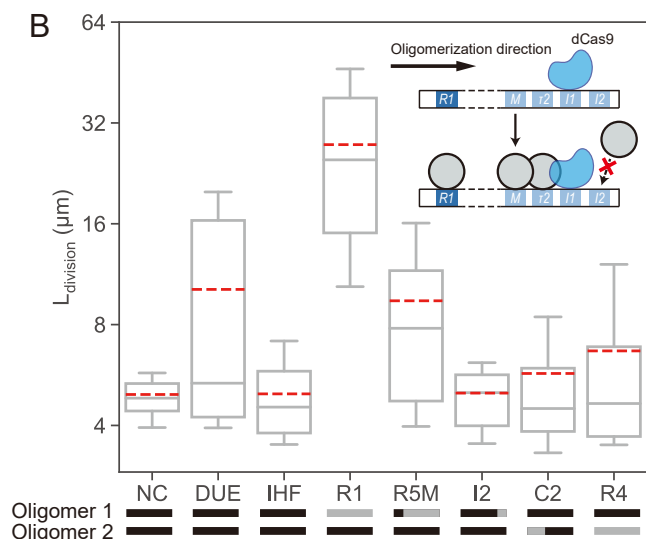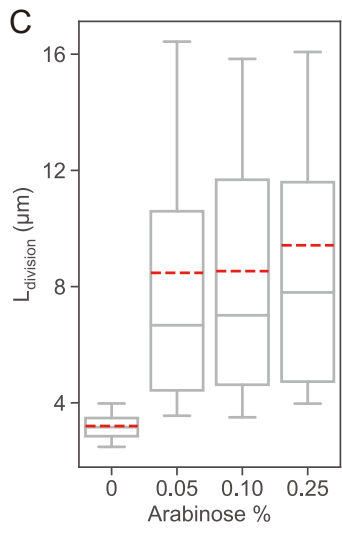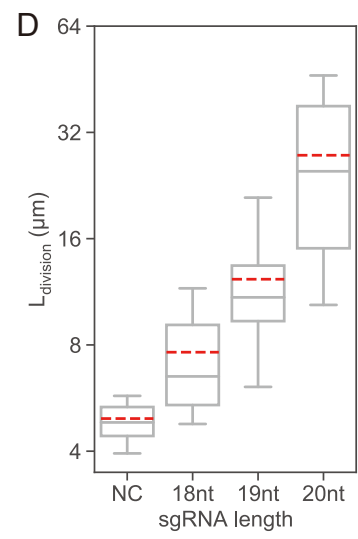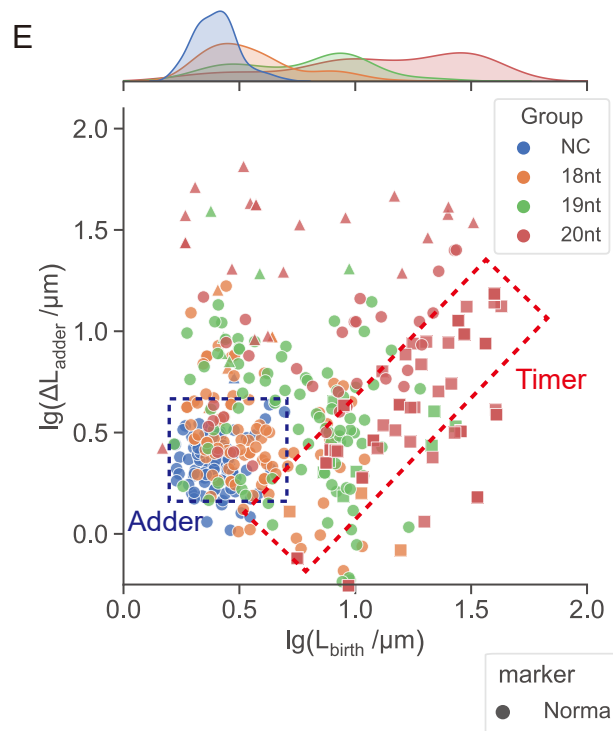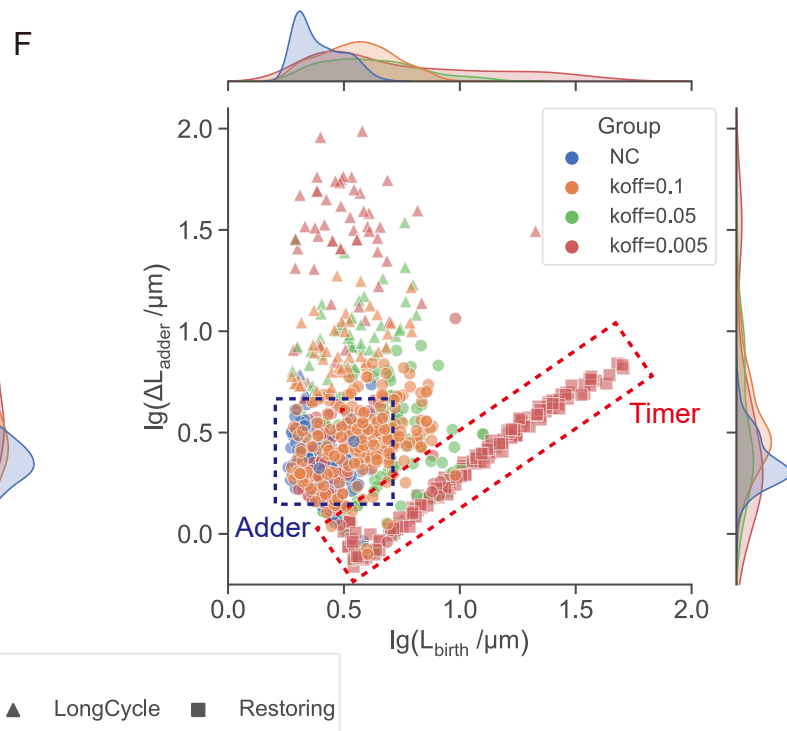

1 **Figure 2. Tunable initiation perturbation by *CRISPRori* led to increased division**  
2 **lengths and the breakdown of the division adder.**

3 **A.** Two models for differential inhibition by *CRISPRori* targeting different DnaA boxes.  
4 Although the R1 box and the R5M box (M) are not adjacent on the linear DNA, IHF  
5 binds to the site in between and bends the DNA to bring both boxes together<sup>16</sup>. In the  
6 random filling model, the probability of replication initiation is a function of a filling  
7 vector in which 1 represents an occupied box and 0 an unoccupied box. In the double-  
8 oligomer model, the probability is assumed to depend on the twisting forces provided  
9 by two DnaA oligomers assembled on the left and right sides of the R2 box.

10 **B-D.** Cell lengths before division for cells treated by *CRISPRori* targeting different sites  
11 in *oriC* (B), at different inducer concentrations (C), and with truncated sgRNAs (D). In  
12 B, the black bars below the *x*-axis indicate the maximal possible lengths of two  
13 oligomers with dCas9 occupying the box, and the grey bars show the full lengths. The  
14 inset shows a schematic of the occlusion effect of dCas9 to DnaA oligomer formation.  
15 In C and D, the targeted boxes were R5M and R1, respectively. In B and D, the inducer  
16 concentrations were all 0.25%.  $N_{\text{cell}} = 25\sim 201$ . NC: negative control. For simulation  
17 results, see **Supplementary Fig. 4**.

18 **E-F.** Experimental (E) and simulation (F) results showing the breakdown of the division  
19 adder under replication initiation perturbations. The increased cell length before  
20 division became widely distributed as perturbation strength increased. Filled triangles  
21 represent significantly elongated cells due to dCas9 inhibition, whereas filled squares  
22 were cell lineages rapidly dividing to restore to normal growth upon dCas9 release (see  
23 also **Fig. 3E**). In this phase, cells obeyed the timer principle, by which division  
24 happened as soon as a new replication cycle was completed (~15 min).

A

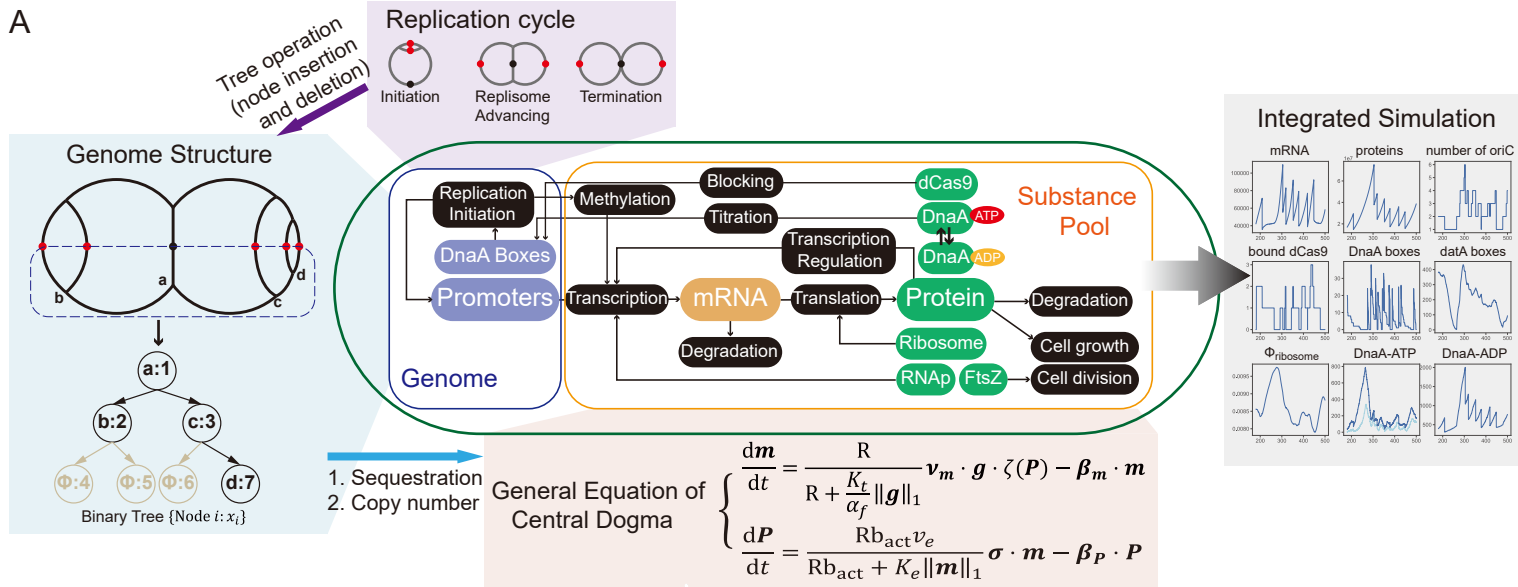

B

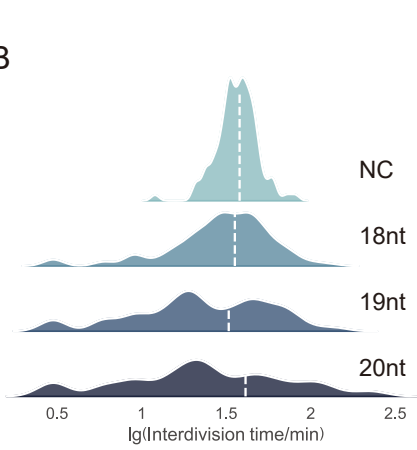

C

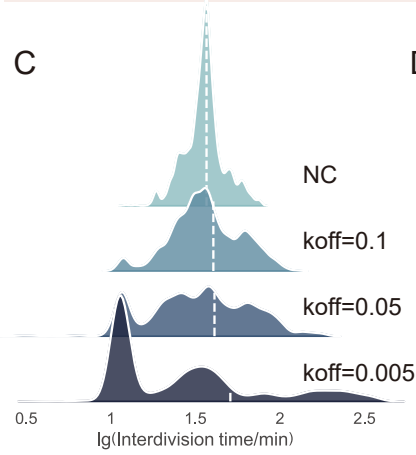

D

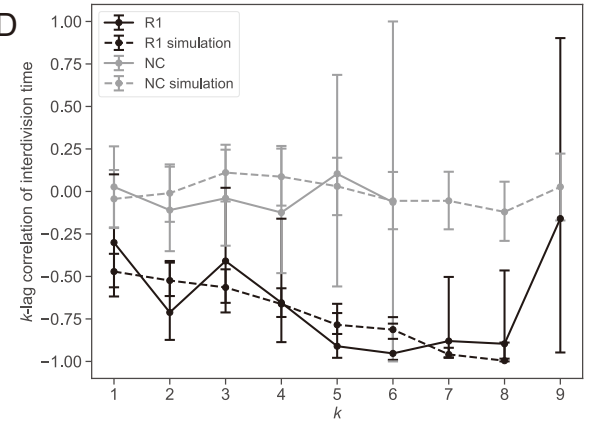

E

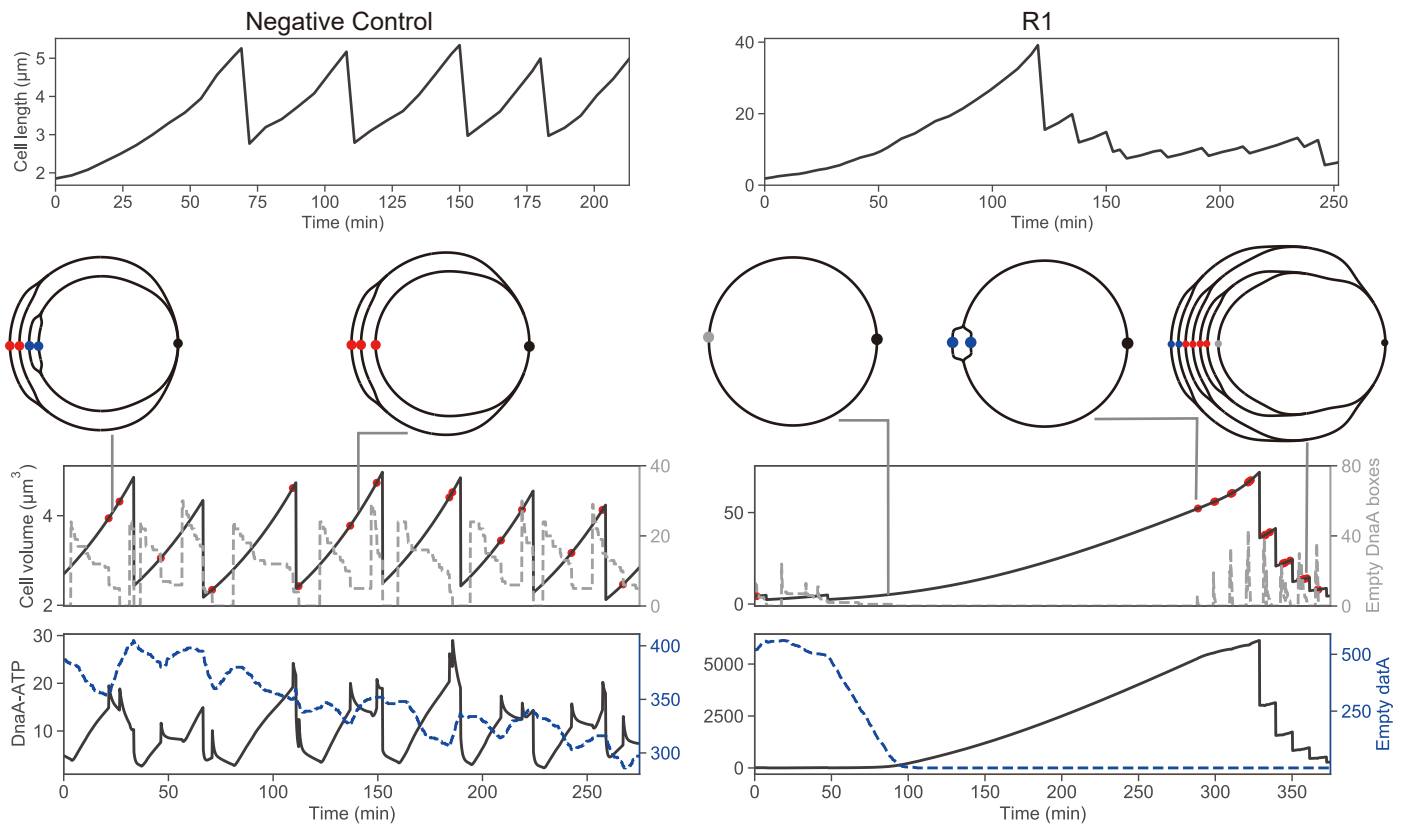

1 **Figure 3. Cell division cycle shows homeostasis under initiation perturbations.**

2 **A.** Schematics of general bacteria growth model coupling protein expression, cell  
3 growth and cell cycles.

4 **B-C.** Experimental (B) and simulated (C) distribution of the interdivision time under  
5 different replication inhibitory strengths, as tuned by the sgRNA length or the dCas9-  
6 sgRNA-DNA dissociation rate. The dashed lines marked the mean interdivision times.

7 **D.** Correlation in interdivision times along cell lineages. The  $k$ -lag correlation is defined  
8 as the correlation between the current interdivision time (generation 0) and the mean  
9 interdivision time for generations 1 through  $k$ . In all lineages, only long interdivision  
10 cycles ( $t_d > t_{\text{threshold}} = 60$  min) were taken as generation 0. Error bar shows the 95% C.I. of  
11 the correlation coefficients.

12 **E.** Experimental and simulated lineages for a normally replicating cell line (left) versus  
13 a *CRISPRori* inhibited cell line (right). The second row of cartoons shows the  
14 replication status of bacterial genomes at various time points, where black points show  
15 the *ter* site, blue points show SeqA sequestered *oriCs* that were accessible to neither  
16 dCas9 nor DnaA, gray points show dCas9-bound *oriCs*, and red points show the *oriCs*  
17 completely accessible to DnaA. The red dots in the lineage plots indicate replication  
18 initiation events. For more details of the simulated lineages, see **Supplementary Fig.**  
19 **9 and Supplementary Video 1&2.**



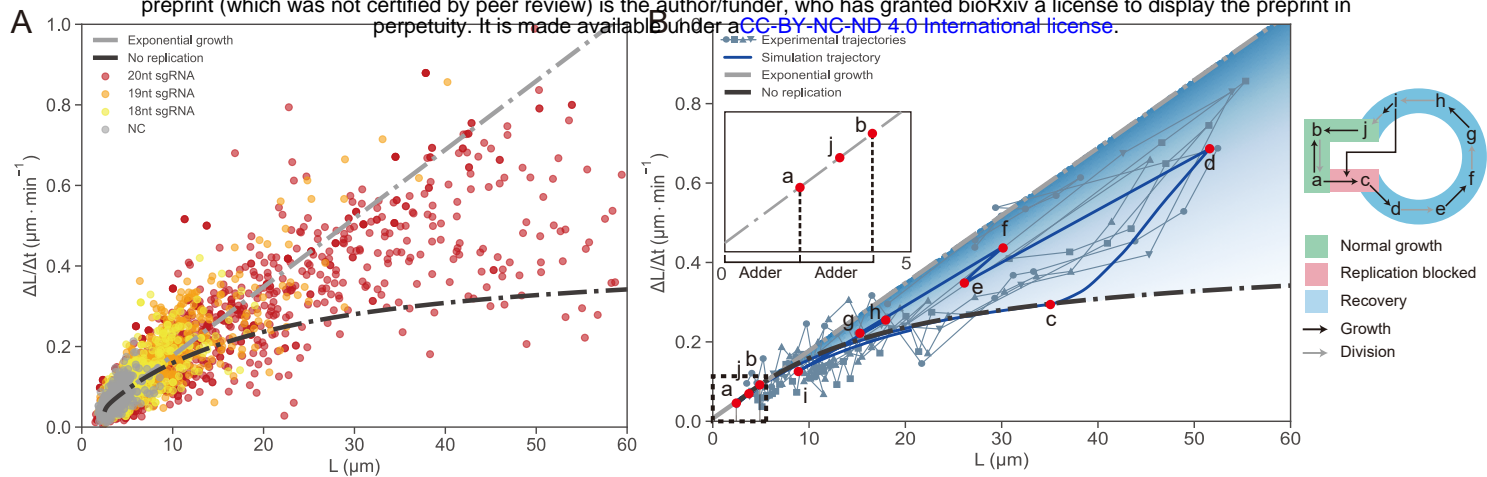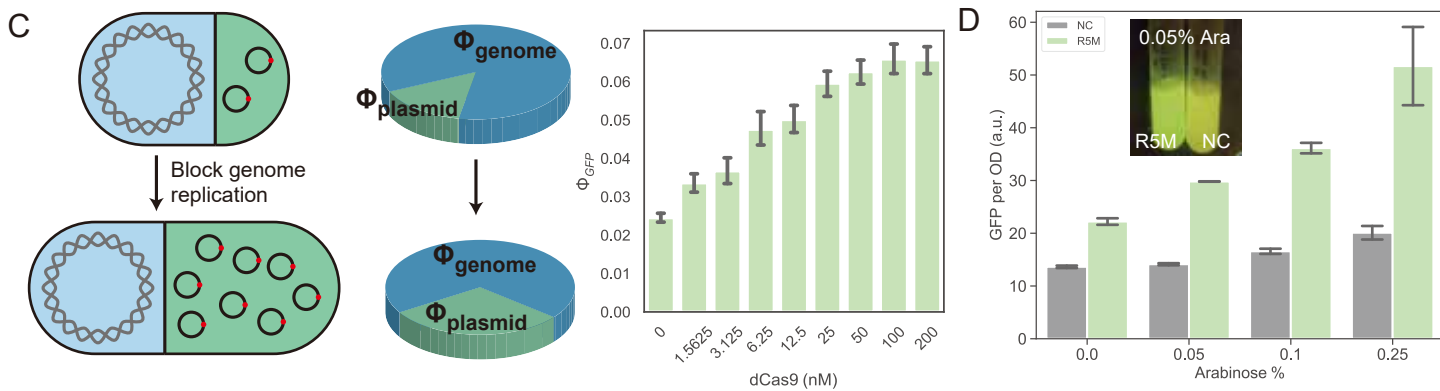

1 **Figure 4. Transition from exponential to linear growth upon genome limitation**  
2 **enhanced expression of plasmid-encoded genes.**

3 **A.** Single-cell growth rate distributions. For exponential growth, the growth rate ( $\Delta L/\Delta t$ )  
4 should be proportional to cell size  $L$  (gray dashed line). The slope of putative  
5 exponential growth decreased as perturbation strength increased. For severely  
6 perturbed cells (20bp sgRNA targeting R1), growth rate plateaued for elongated cells  
7 (black dashed line), indicating a linear growth pattern.

8 **B.** Phase diagram for cellular growth states under a constant nutritional condition, as  
9 calculated by numerical simulations. The blue area between the exponential-growth line  
10 and the none-replication curve shows the permitted regime for balanced cell growth.  
11 Shading reflects the DNA:cytoplasmic ratio (darker shades for higher ratios).  
12 Trajectories of four experimentally tracked cell lineages (the R1 box blocked by dCas9,  
13 arabinose=0.25%), are plotted as gray curves with different markers. The thick blue  
14 curve shows a simulated trajectory, with letters indicating transitions between the  
15 normally replicating and the replication suppressed states as illustrated on the right. The  
16 inset is an enlarged view of the regime for non-perturbed cell states.

17 **C.** Schematic (left) and simulated (right) intracellular resource allocation between the  
18 bacterial genome and the plasmids under normal and replication suppressed conditions.  
19  $\Phi$  denotes the proteomic fraction. Error bars show 95% C.I. of  $\Phi_{\text{GFP}}$  for cells at 6 hours  
20 in simulation.

21 **D.** Bulk measurements of the plasmid-borne GFP expression with genomic replication  
22 initiation inhibited by *CRISPRori*. Error bars show s.d. of three experimental replicates.  
23 For other measures of GFP expression, see **Supplementary Fig. 13**.

24  
25

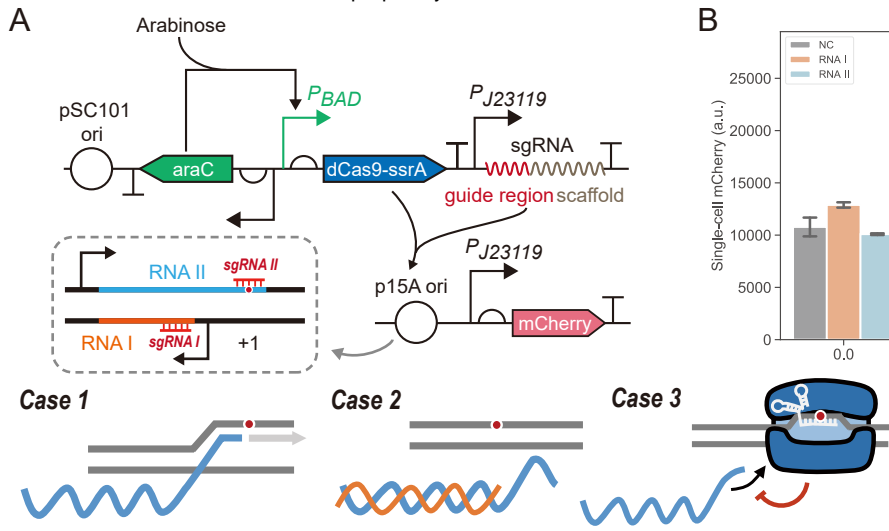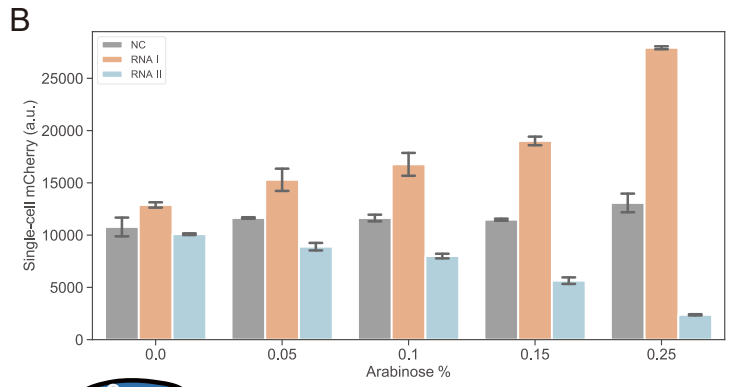

1 **Figure 5. Bidirectional control of p15A plasmid copy number using *CRISPRori*.**

2 **A.** Copy number control of p15A plasmid by antisense RNAs and *CRISPRori*. The  
3 *CRISPRori* system was placed on a plasmid of pSC101 origin. The p15A plasmid  
4 harbored a constitutively expressed *mrfp* to indicate its copy number. At the p15A  
5 origin, RNA II (processed by RNaseH, not shown) acts as a primer for DNA polymerase  
6 to initiate DNA replication at the +1 site (Case 1). RNA I can hybridize with RNA II,  
7 preventing DNA-RNA II hybrid formation and replication initiation (Case 2). Two  
8 sgRNAs were designed to down-regulate RNA I and block the initiation site (Case 3),  
9 respectively.

10 **B.** Copy number changes under the influence of *CRISPRori*. When targeting RNA I  
11 (sgRNA I) or the initiation site (sgRNA II), plasmid copy number was up- or down-  
12 regulated, respectively. Error bars show s.d. of three experimental replicates.

## 1   **References**

2

3   1     Bartek, J., Lukas, C. & Lukas, J. Checking on DNA damage in S phase. *Nat Rev*  
4     *Mol Cell Biol* **5**, 792-804, doi:10.1038/nrm1493 (2004).

5   2     Fragkos, M., Ganier, O., Coulombe, P. & Mechali, M. DNA replication origin  
6     activation in space and time. *Nat Rev Mol Cell Biol* **16**, 360-374,  
7     doi:10.1038/nrm4002 (2015).

8   3     Galli, M. & Morgan, D. O. Cell Size Determines the Strength of the Spindle  
9     Assembly Checkpoint during Embryonic Development. *Dev Cell* **36**, 344-352,  
10    doi:10.1016/j.devcel.2016.01.003 (2016).

11  4     Miettinen, T. P. & Bjorklund, M. Cellular Allometry of Mitochondrial  
12    Functionality Establishes the Optimal Cell Size. *Dev Cell* **39**, 370-382,  
13    doi:10.1016/j.devcel.2016.09.004 (2016).

14  5     Ginzberg, M. B., Kafri, R. & Kirschner, M. Cell biology. On being the right  
15    (cell) size. *Science* **348**, 1245075, doi:10.1126/science.1245075 (2015).

16  6     Neurohr, G. E. *et al.* Excessive Cell Growth Causes Cytoplasm Dilution And  
17    Contributes to Senescence. *Cell* **176**, 1083-1097 e1018,  
18    doi:10.1016/j.cell.2019.01.018 (2019).

19  7     Bernal-Mizrachi, E., Wen, W., Stahlhut, S., Welling, C. M. & Permutt, M. A.  
20    Islet  $\beta$  cell expression of constitutively active Akt1/PKB $\alpha$  induces striking  
21    hypertrophy, hyperplasia, and hyperinsulinemia. *Journal of Clinical*  
22    *Investigation* **108**, 1631-1638, doi:10.1172/jci200113785 (2001).

23  8     Li, Q., Rycaj, K., Chen, X. & Tang, D. G. Cancer stem cells and cell size: A  
24    causal link? *Semin Cancer Biol* **35**, 191-199,  
25    doi:10.1016/j.semcancer.2015.07.002 (2015).

26  9     Monod, J. The phenomenon of enzymatic adaptation and its bearings on  
27    problems of genetics and cellular differentiation. *Growth* **11**, 223-289 (1947).

28  10    Schaechter, M., Maaloe, O. & Kjeldgaard, N. O. Dependency on medium and  
29    temperature of cell size and chemical composition during balanced grown of

- 1 Salmonella typhimurium. *J Gen Microbiol* **19**, 592-606, doi:10.1099/00221287-  
2 19-3-592 (1958).
- 3 11 Scott, M., Gunderson, C. W., Mateescu, E. M., Zhang, Z. & Hwa, T.  
4 Interdependence of cell growth and gene expression: origins and consequences.  
5 *Science* **330**, 1099-1102, doi:10.1126/science.1192588 (2010).
- 6 12 Erickson, D. W. *et al.* A global resource allocation strategy governs growth  
7 transition kinetics of *Escherichia coli*. *Nature* **551**, 119-123,  
8 doi:10.1038/nature24299 (2017).
- 9 13 Basan, M. *et al.* A universal trade-off between growth and lag in fluctuating  
10 environments. *Nature* **584**, 470-474, doi:10.1038/s41586-020-2505-4 (2020).
- 11 14 Wu, G. *et al.* Metabolic Burden: Cornerstones in Synthetic Biology and  
12 Metabolic Engineering Applications. *Trends Biotechnol* **34**, 652-664,  
13 doi:10.1016/j.tibtech.2016.02.010 (2016).
- 14 15 Reuveni, S., Ehrenberg, M. & Paulsson, J. Ribosomes are optimized for  
15 autocatalytic production. *Nature* **547**, 293-297, doi:10.1038/nature22998  
16 (2017).
- 17 16 Katayama, T., Ozaki, S., Keyamura, K. & Fujimitsu, K. Regulation of the  
18 replication cycle: conserved and diverse regulatory systems for DnaA and oriC.  
19 *Nat Rev Microbiol* **8**, 163-170, doi:10.1038/nrmicro2314 (2010).
- 20 17 Wu, L. J. & Errington, J. Nucleoid occlusion and bacterial cell division. *Nat Rev*  
21 *Microbiol* **10**, 8-12, doi:10.1038/nrmicro2671 (2011).
- 22 18 Couturier, E. & Rocha, E. P. Replication-associated gene dosage effects shape  
23 the genomes of fast-growing bacteria but only for transcription and translation  
24 genes. *Mol Microbiol* **59**, 1506-1518, doi:10.1111/j.1365-2958.2006.05046.x  
25 (2006).
- 26 19 Sauer, C. *et al.* Effect of Genome Position on Heterologous Gene Expression in  
27 *Bacillus subtilis*: An Unbiased Analysis. *ACS Synth Biol* **5**, 942-947,  
28 doi:10.1021/acssynbio.6b00065 (2016).
- 29 20 Garmendia, E., Brandis, G. & Hughes, D. Transcriptional Regulation Buffers  
30 Gene Dosage Effects on a Highly Expressed Operon in *Salmonella*. *mBio* **9**,

- 1           doi:10.1128/mBio.01446-18 (2018).
- 2   21    Liang, S. *et al.* Activities of constitutive promoters in Escherichia coli. *J Mol*  
3           *Biol* **292**, 19-37, doi:10.1006/jmbi.1999.3056 (1999).
- 4   22    Bakshi, S., Dalrymple, R. M., Li, W., Choi, H. & Weisshaar, J. C. Partitioning  
5           of RNA polymerase activity in live Escherichia coli from analysis of single-  
6           molecule diffusive trajectories. *Biophys J* **105**, 2676-2686,  
7           doi:10.1016/j.bpj.2013.10.024 (2013).
- 8   23    Patrick, M., Dennis, P. P., Ehrenberg, M. & Bremer, H. Free RNA polymerase  
9           in Escherichia coli. *Biochimie* **119**, 80-91, doi:10.1016/j.biochi.2015.10.015  
10          (2015).
- 11   24    Si, F. *et al.* Mechanistic Origin of Cell-Size Control and Homeostasis in Bacteria.  
12          *Curr Biol* **29**, 1760-1770 e1767, doi:10.1016/j.cub.2019.04.062 (2019).
- 13   25    Hansen, F. G. & Atlung, T. The DnaA Tale. *Front Microbiol* **9**, 319,  
14          doi:10.3389/fmicb.2018.00319 (2018).
- 15   26    Rueda, S., Vicente, M. & Mingorance, J. Concentration and assembly of the  
16          division ring proteins FtsZ, FtsA, and ZipA during the Escherichia coli cell cycle.  
17          *J Bacteriol* **185**, 3344-3351, doi:10.1128/jb.185.11.3344-3351.2003 (2003).
- 18   27    Sekar, K. *et al.* Synthesis and degradation of FtsZ quantitatively predict the first  
19          cell division in starved bacteria. *Mol Syst Biol* **14**, e8623,  
20          doi:10.15252/msb.20188623 (2018).
- 21   28    Willis, L. & Huang, K. C. Sizing up the bacterial cell cycle. *Nat Rev Microbiol*  
22          **15**, 606-620, doi:10.1038/nrmicro.2017.79 (2017).
- 23   29    Cooper, S. & Helmstetter, C. E. Chromosome replication and the division cycle  
24          of Escherichia coli. *Journal of Molecular Biology* **31**, 519-540,  
25          doi:10.1016/0022-2836(68)90425-7 (1968).
- 26   30    Donachie, W. D. Relationship between cell size and time of initiation of DNA  
27          replication. *Nature* **219**, 1077-1079, doi:10.1038/2191077a0 (1968).
- 28   31    Amir, A. Cell Size Regulation in Bacteria. *Physical Review Letters* **112**,  
29          doi:10.1103/PhysRevLett.112.208102 (2014).
- 30   32    Campos, M. *et al.* A Constant Size Extension Drives Bacterial Cell Size

- 1 Homeostasis. *Cell* **159**, 1433-1446, doi:10.1016/j.cell.2014.11.022 (2014).
- 2 33 Taheri-Araghi, S. *et al.* Cell-Size Control and Homeostasis in Bacteria. *Current*  
3 *Biology* **25**, 385-391, doi:10.1016/j.cub.2014.12.009 (2015).
- 4 34 Scott, M., Klumpp, S., Mateescu, E. M. & Hwa, T. Emergence of robust growth  
5 laws from optimal regulation of ribosome synthesis. *Mol Syst Biol* **10**, 747,  
6 doi:10.15252/msb.20145379 (2014).
- 7 35 Basan, M. *et al.* Inflating bacterial cells by increased protein synthesis. *Mol Syst*  
8 *Biol* **11**, 836, doi:10.15252/msb.20156178 (2015).
- 9 36 Hui, S. *et al.* Quantitative proteomic analysis reveals a simple strategy of global  
10 resource allocation in bacteria. *Mol Syst Biol* **11**, 784,  
11 doi:10.15252/msb.20145697 (2015).
- 12 37 Zhu, M., Pan, Y. & Dai, X. (p)ppGpp: the magic governor of bacterial growth  
13 economy. *Curr Genet* **65**, 1121-1125, doi:10.1007/s00294-019-00973-z (2019).
- 14 38 Elliott, S. G. Regulation of the maximal rate of RNA synthesis in the fission  
15 yeast *Schizosaccharomyces pombe*. *Mol Gen Genet* **192**, 212-217,  
16 doi:10.1007/BF00327668 (1983).
- 17 39 Zhurinsky, J. *et al.* A coordinated global control over cellular transcription. *Curr*  
18 *Biol* **20**, 2010-2015, doi:10.1016/j.cub.2010.10.002 (2010).
- 19 40 Lin, J. & Amir, A. Homeostasis of protein and mRNA concentrations in growing  
20 cells. *Nature Communications* **9**, doi:10.1038/s41467-018-06714-z (2018).
- 21 41 Leonard, A. C. & Grimwade, J. E. The orisome: structure and function. *Front*  
22 *Microbiol* **6**, 545, doi:10.3389/fmicb.2015.00545 (2015).
- 23 42 Bae, S., Park, J. & Kim, J. S. Cas-OFFinder: a fast and versatile algorithm that  
24 searches for potential off-target sites of Cas9 RNA-guided endonucleases.  
25 *Bioinformatics* **30**, 1473-1475, doi:10.1093/bioinformatics/btu048 (2014).
- 26 43 Athale, C. A. & Chaudhari, H. Population length variability and nucleoid  
27 numbers in *Escherichia coli*. *Bioinformatics* **27**, 2944-2948,  
28 doi:10.1093/bioinformatics/btr501 (2011).
- 29 44 Wehrens, M. *et al.* Size Laws and Division Ring Dynamics in Filamentous  
30 *Escherichia coli* cells. *Curr Biol* **28**, 972-979 e975,



- 1           doi:10.1016/j.cub.2018.02.006 (2018).
- 2   45    Cayron, J. & Lesterlin, C. Multi-scale Analysis of Bacterial Growth Under  
3    Stress Treatments. *Journal of visualized experiments : JoVE*,  
4    doi:10.3791/60576 (2019).
- 5   46    Wang, Y., Ran, M., Wang, J., Ouyang, Q. & Luo, C. Studies of Antibiotic  
6    Resistance of Beta-Lactamase Bacteria under Different Nutrition Limitations at  
7    the Single-Cell Level. *PLoS One* **10**, e0127115,  
8    doi:10.1371/journal.pone.0127115 (2015).
- 9   47    Zaritsky, A., Rabinovitch, A., Liu, C. & Woldringh, C. L. Does the eclipse limit  
10   bacterial nucleoid complexity and cell width? *Synthetic and systems*  
11   *biotechnology* **2**, 267-275, doi:10.1016/j.synbio.2017.11.004 (2017).
- 12   48    Jones, D. L. *et al.* Kinetics of dCas9 target search in Escherichia coli. *Science*  
13    **357**, 1420-1424, doi:10.1126/science.aah7084 (2017).
- 14   49    Wiktor, J., Lesterlin, C., Sherratt, D. J. & Dekker, C. CRISPR-mediated control  
15   of the bacterial initiation of replication. *Nucleic acids research* **44**, 3801-3810  
16   (2016).
- 17   50    Stepankiw, N., Kaidow, A., Boye, E. & Bates, D. The right half of the  
18   Escherichia coli replication origin is not essential for viability, but facilitates  
19   multi-forked replication. *Mol Microbiol* **74**, 467-479, doi:10.1111/j.1365-  
20   2958.2009.06877.x (2009).
- 21   51    Vigouroux, A., Oldewurtel, E., Cui, L., Bikard, D. & van Teeffelen, S. Tuning  
22   dCas9's ability to block transcription enables robust, noiseless knockdown of  
23   bacterial genes. *Mol Syst Biol* **14**, e7899, doi:10.15252/msb.20177899 (2018).
- 24   52    Wallden, M., Fange, D., Lundius, E. G., Baltekin, O. & Elf, J. The  
25   Synchronization of Replication and Division Cycles in Individual E. coli Cells.  
26   *Cell* **166**, 729-739, doi:10.1016/j.cell.2016.06.052 (2016).
- 27   53    Logsdon, M. M. *et al.* A Parallel Adder Coordinates Mycobacterial Cell-Cycle  
28   Progression and Cell-Size Homeostasis in the Context of Asymmetric Growth  
29   and Organization. *Curr Biol* **27**, 3367-3374 e3367,  
30   doi:10.1016/j.cub.2017.09.046 (2017).

- 1 54 Eun, Y. J. *et al.* Archaeal cells share common size control with bacteria despite  
2 noisier growth and division. *Nat Microbiol* **3**, 148-154, doi:10.1038/s41564-  
3 017-0082-6 (2018).
- 4 55 Dourado, H. & Lercher, M. J. An analytical theory of balanced cellular growth.  
5 *Nat Commun* **11**, 1226, doi:10.1038/s41467-020-14751-w (2020).
- 6 56 Bratton, B. P., Mooney, R. A. & Weisshaar, J. C. Spatial distribution and  
7 diffusive motion of RNA polymerase in live *Escherichia coli*. *J Bacteriol* **193**,  
8 5138-5146, doi:10.1128/JB.00198-11 (2011).
- 9 57 Rolinson, G. N. Effect of beta-lactam antibiotics on bacterial cell growth rate. *J*  
10 *Gen Microbiol* **120**, 317-323, doi:10.1099/00221287-120-2-317 (1980).
- 11 58 Del Solar, G. & Espinosa, M. Plasmid copy number control: an ever-growing  
12 story. *Molecular microbiology* **37**, 492-500 (2000).
- 13 59 Brantl, S. Plasmid replication control by antisense RNAs. *Plasmids: Biology*  
14 *and Impact in Biotechnology and Discovery*, 83-103 (2015).
- 15 60 Selzer, G., Som, T., Itoh, T. & Tomizawa, J.-i. The origin of replication of  
16 plasmid p15A and comparative studies on the nucleotide sequences around the  
17 origin of related plasmids. *Cell* **32**, 119-129 (1983).
- 18 61 Baumgart, L., Mather, W. & Hasty, J. Synchronized DNA cycling across a  
19 bacterial population. *Nature genetics* **49**, 1282-1285 (2017).
- 20 62 Grimwade, J. E. *et al.* Origin recognition is the predominant role for DnaA-ATP  
21 in initiation of chromosome replication. *Nucleic Acids Res* **46**, 6140-6151,  
22 doi:10.1093/nar/gky457 (2018).
- 23 63 Flatten, I., Fossum-Raunehaug, S., Taipale, R., Martinsen, S. & Skarstad, K.  
24 The DnaA Protein Is Not the Limiting Factor for Initiation of Replication in  
25 *Escherichia coli*. *PLoS Genet* **11**, e1005276, doi:10.1371/journal.pgen.1005276  
26 (2015).
- 27 64 Langer, U., Richter, S., Roth, A., Weigel, C. & Messer, W. A comprehensive set  
28 of DnaA-box mutations in the replication origin, *oriC*, of *Escherichia coli*. *Mol*  
29 *Microbiol* **21**, 301-311, doi:10.1046/j.1365-2958.1996.6481362.x (1996).

- 1 65 Si, F. *et al.* Invariance of Initiation Mass and Predictability of Cell Size in  
2 Escherichia coli. *Curr Biol* **27**, 1278-1287, doi:10.1016/j.cub.2017.03.022  
3 (2017).
- 4 66 Whinn, K. S. *et al.* Nuclease dead Cas9 is a programmable roadblock for DNA  
5 replication. *Sci Rep* **9**, 13292, doi:10.1038/s41598-019-49837-z (2019).
- 6 67 Luo, H. & Gao, F. DoriC 10.0: an updated database of replication origins in  
7 prokaryotic genomes including chromosomes and plasmids. *Nucleic Acids Res*  
8 **47**, D74-D77, doi:10.1093/nar/gky1014 (2019).
- 9 68 Knott, G. J. & Doudna, J. A. CRISPR-Cas guides the future of genetic  
10 engineering. *Science* **361**, 866-869, doi:10.1126/science.aat5011 (2018).
- 11 69 Zhang, H. M. *et al.* Measurements of Gene Expression at Steady State Improve  
12 the Predictability of Part Assembly. *ACS Synth Biol* **5**, 269-273,  
13 doi:10.1021/acssynbio.5b00156 (2016).
- 14 70 Zong, Y. *et al.* Insulated transcriptional elements enable precise design of  
15 genetic circuits. *Nat Commun* **8**, 52, doi:10.1038/s41467-017-00063-z (2017).
- 16
